# Supplementary material for: Preparation and capacitive properties of a free-standing phosphomolybdic acid heteropoly blue modified reduced graphite oxide composite
Source: Royal Society of Chemistry journal article supplement (doi:10.1039/d0se01838d), 2021-01-01
Supplement: d0se01838d1.pdf [file d0se01838d1.pdf]

## Supporting information

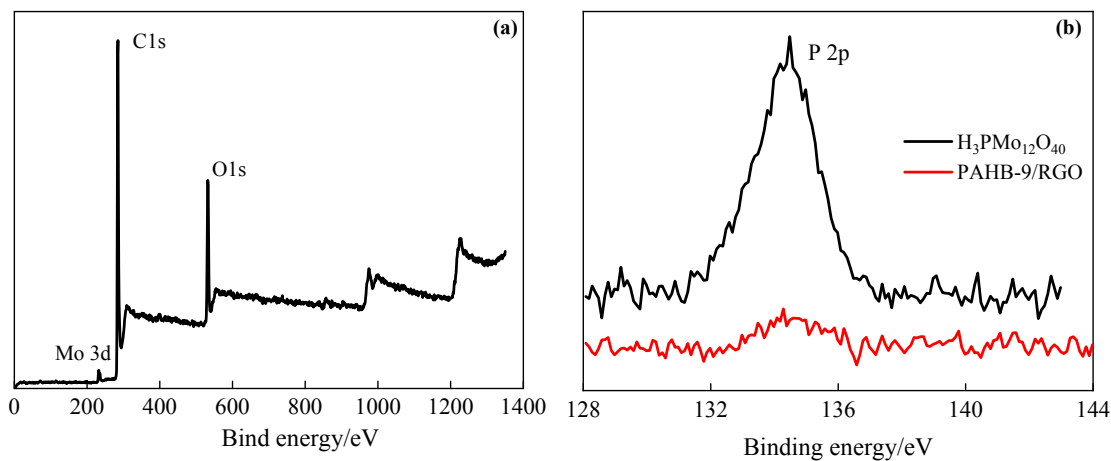

Fig. S1 XPS spectra of (a) PAHB/RGO composite, (b) P 2p, (c) Mo 3d and (d) C 1s

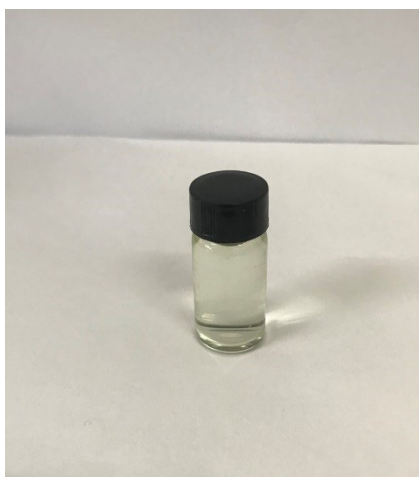

Fig. S2 The digital photo of H<sub>3</sub>PMo<sub>12</sub>O<sub>40</sub> solution after heated at 180 °C for 12 h.
